# Supplementary material
Source: publisher figshare collection journal article supplement (https://acs.figshare.com/ndownloader/files/4712965)
Supplement: Supplementary file 1 [file 4712965]

# Surface Organization, Light Driven Surface Changes and Stability of Semifluorinated Azobenzene Polymers

## Supporting Information

*Marvin Y. Paik,<sup>1</sup> Sitaraman Krishnan,<sup>1</sup> Fengxiang You,<sup>1</sup> Xuefa Li,<sup>1</sup> Alexander Hexemer,<sup>2</sup> Yushi Ando,<sup>1</sup>  
Seok Ho Kang,<sup>1</sup> Daniel A. Fischer,<sup>4</sup> Edward J. Kramer,<sup>2,3</sup> and Christopher K. Ober<sup>1,\*</sup>*

\* To whom correspondence should be addressed.

Christopher K. Ober, [cober@ccmr.cornell.edu](mailto:cober@ccmr.cornell.edu). Tel: 607-255-8417. Fax: 607-255-2365.

<sup>1</sup> Department of Materials Science and Engineering, Cornell University

<sup>2</sup> Department of Materials, University of California at Santa Barbara

<sup>3</sup> Department of Chemical Engineering, University of California at Santa Barbara

<sup>4</sup> National Institute of Standards and Technology

Differential scanning calorimetry was done using the Perkin-Elmer DCS-7 Series instrument to characterize the thermal properties of the polymers synthesized and mentioned in the paper. Atomic force microscopy images were taken using the DI-3100 AFM from Digital instruments under tapping mode. Amplitude setpoints ranging from 40-60% were used (hard tapping) to obtain images with the best phase contrast.

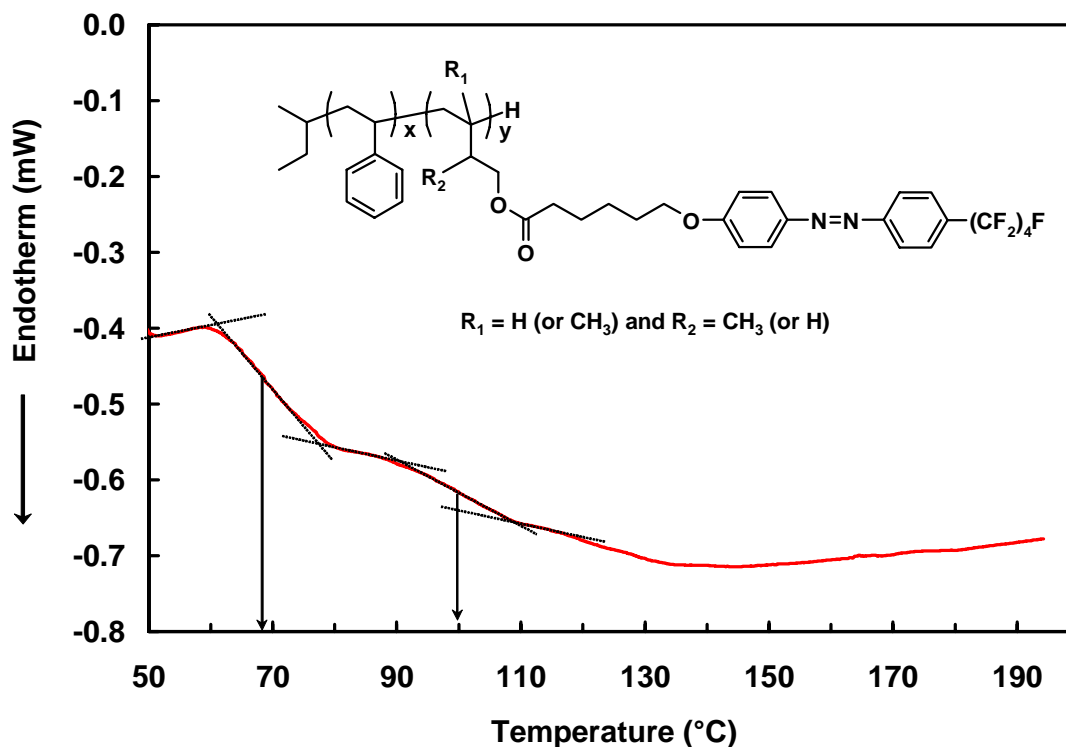

**Figure 1.** Differential scanning calorimetry (DSC) trace of PSPI-F4. The sample was heated under nitrogen to 200 °C at 20 °C/min. The transitions centered near 70 °C and 100 °C correspond to glass transition of the PI-F4 and PS blocks, respectively.

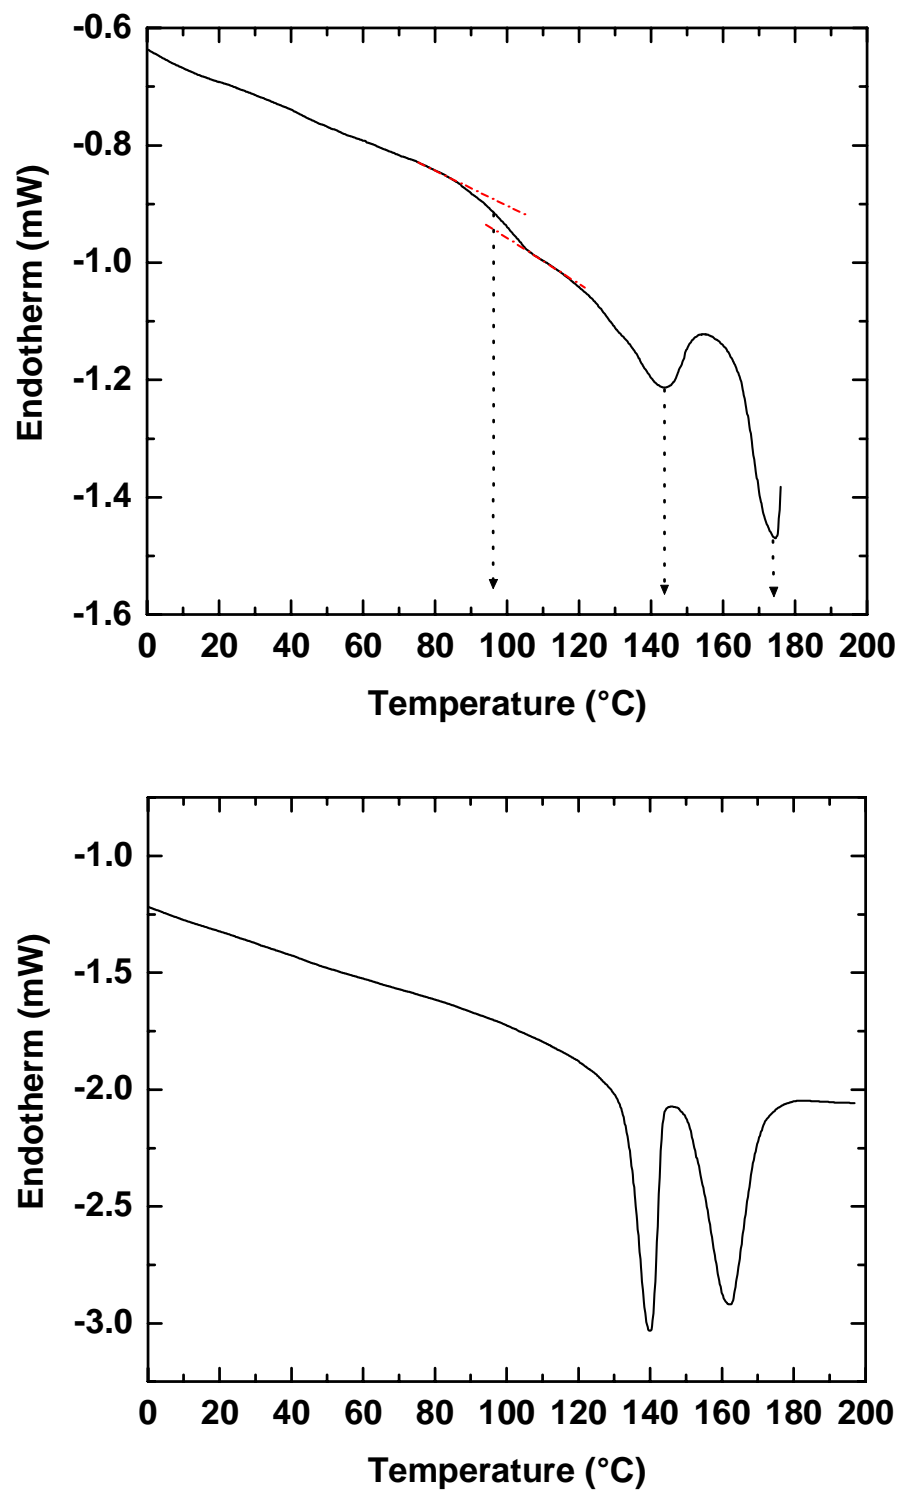

**Figure 2.** DSC traces of PSPI-F8 (top) and PI-F8 (bottom). The samples were first heated under nitrogen to 200 °C at 10 °C/min, annealed at 200 °C for 1 min and cooled to -50 °C at 10 °C /min. The data shown correspond to the second heating step.

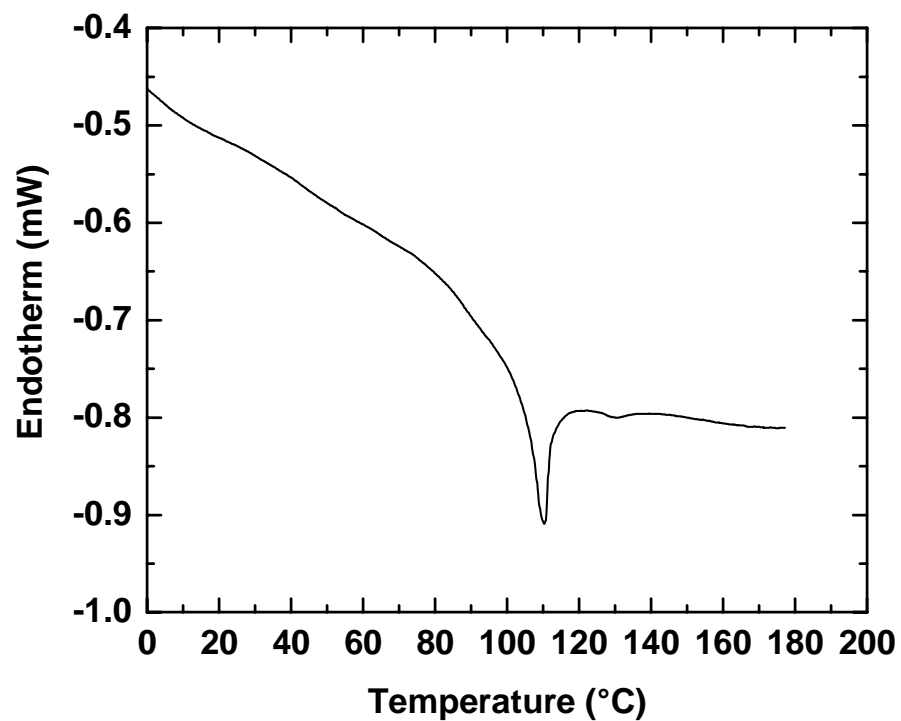

**Figure 3.** DSC trace of PSPI-F6, obtained as stated in caption to Fig 2.

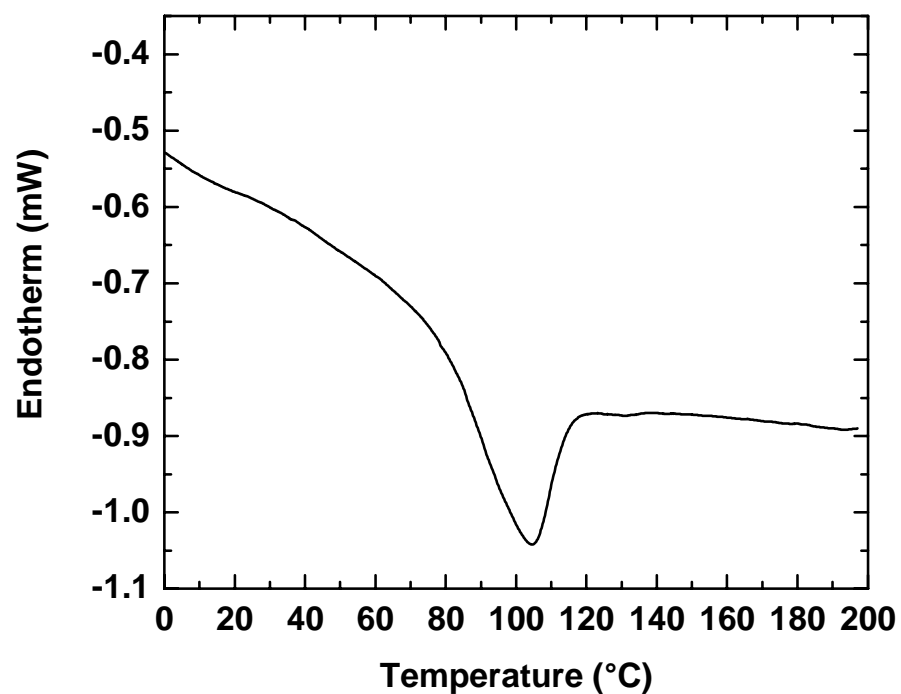

**Figure 4.** DSC trace of PSPI-F<sub>60.5</sub>, obtained as stated in caption to Fig 2.

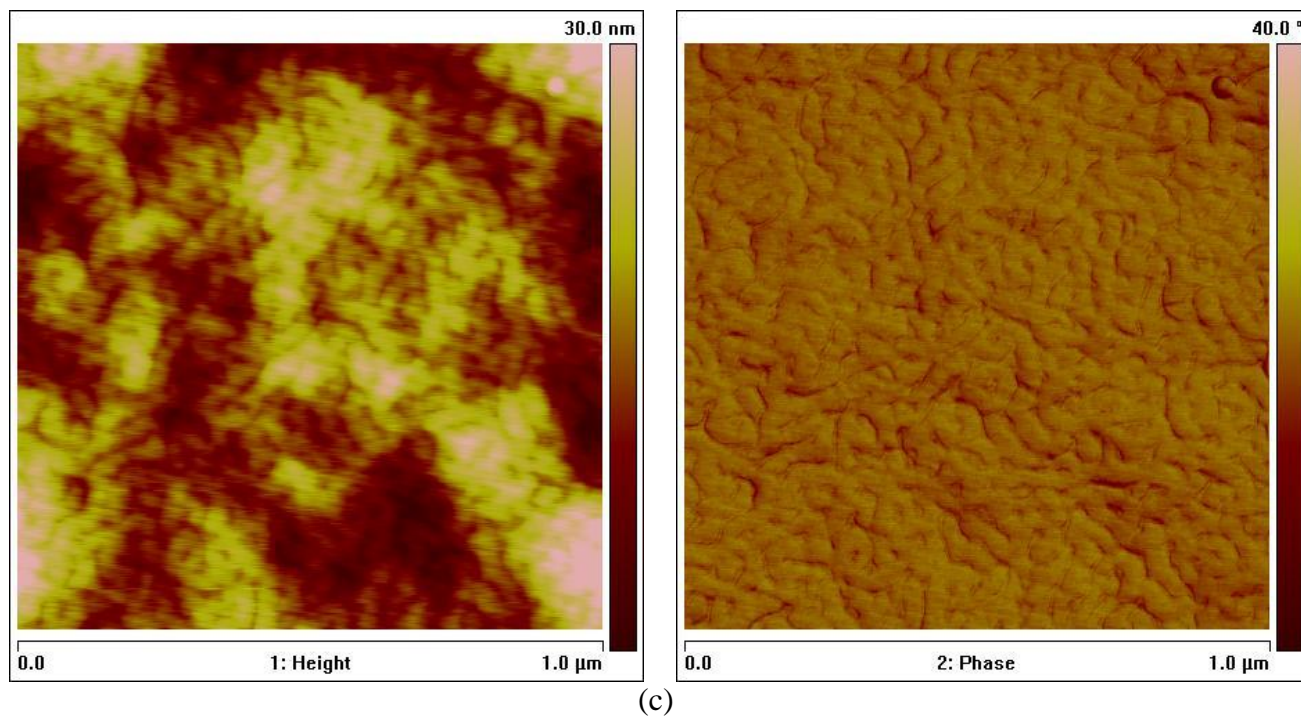

**Figure 5.** Atomic force microscopy (AFM) height and phase images of PSPI-F8.
